# Supplementary material for: Antiproliferative effect of Dendrobium catenatum Lindley polypeptides against human liver, gastric and breast cancer cell lines
Source: Royal Society of Chemistry journal article supplement (doi:10.1039/c5fo00060b), 2015-01-01
Supplement: c5fo00060b1.pdf [file c5fo00060b1.pdf]

## Supplemental materials

### Peptide synthesis

Peptides were custom-synthesized by Aite Biotechnol Ltd. (Nanjing, China) using standard Fmoc method. HPLC-MS (Waters ZQ 2000, Waters, USA) was used to measure molecular weight and purity with the following parameter settings: chromatographic column Gemini-NX 5 $\mu$  C18 110A (4.6 $\times$ 250 mm); solvent A (0.1% Trifluoroacetic Acid in 100% Acetonitrile); solvent B (0.1% Trifluoroacetic Acid in 100% Water); gradient parameters including 0.0 min (A:B=15:85), 25 min (A:B=40:60), 25.1 min(A:B=100:0), 30 min (stop); injection volume 20  $\mu$ l; flow rate 1 ml/min; ion source ESI; assay wave length 220 nm.

HPLC-MS analysis (Fig.S1-S6) showed that the purity of the synthesized peptides P1,P2 and P3 is 98.7%,98.5% and 98.1%, the corresponding molecular weight is 1417.09, 2995.54 and 1504.64, respectively, the error is less than 0.1 %.

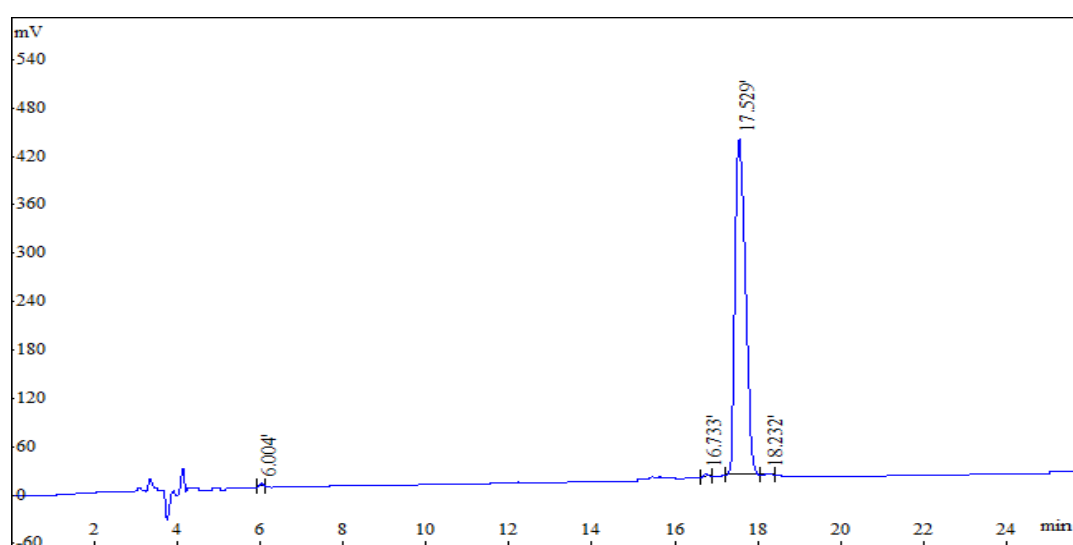

Fig.S1

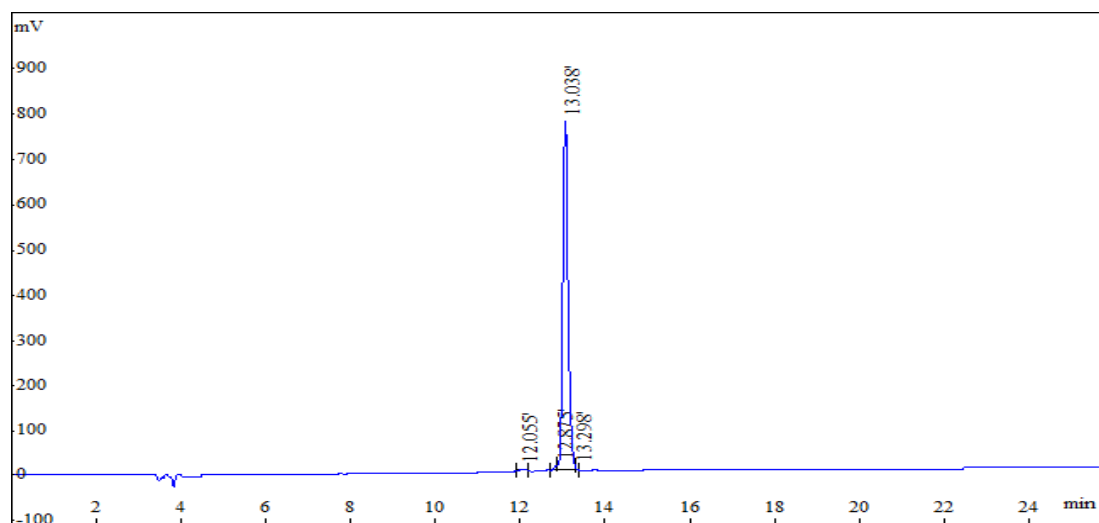

Fig.S2

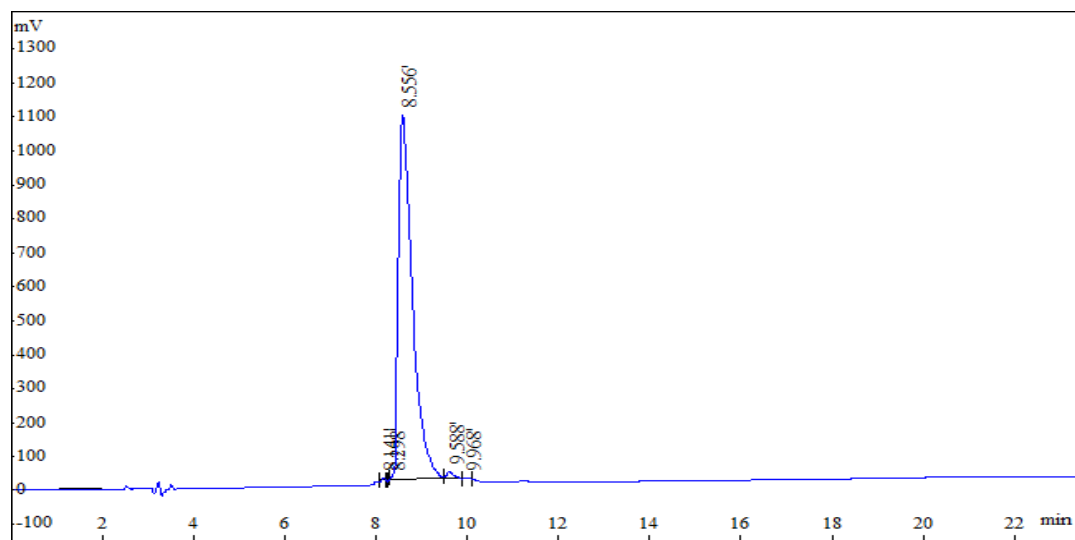

Fig.S3

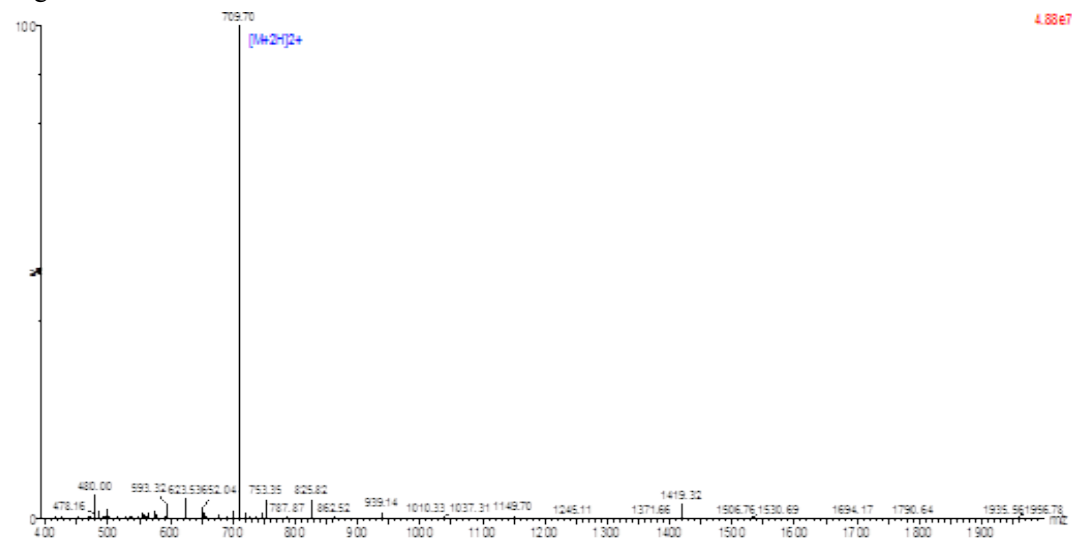

Fig.S4

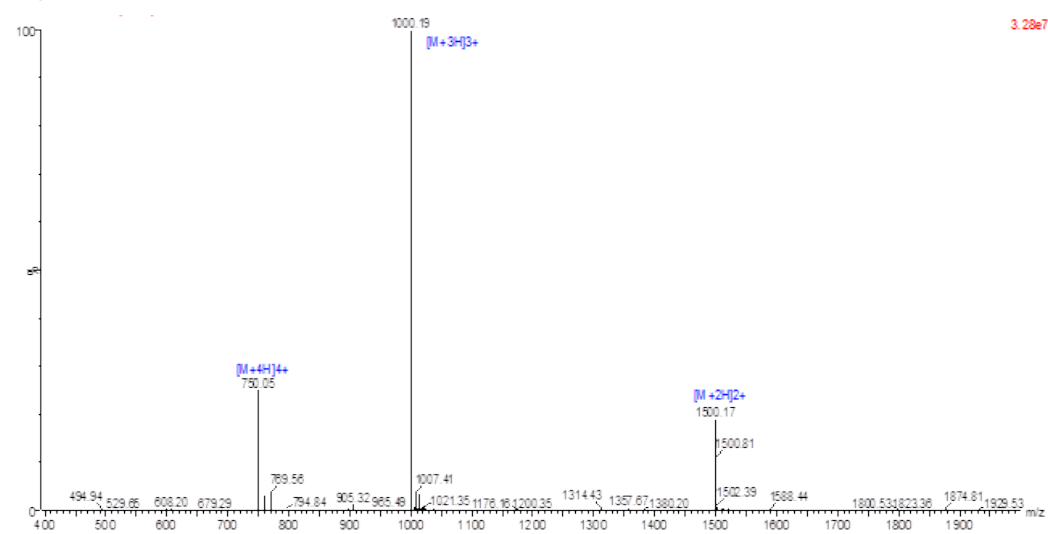

Fig.S5

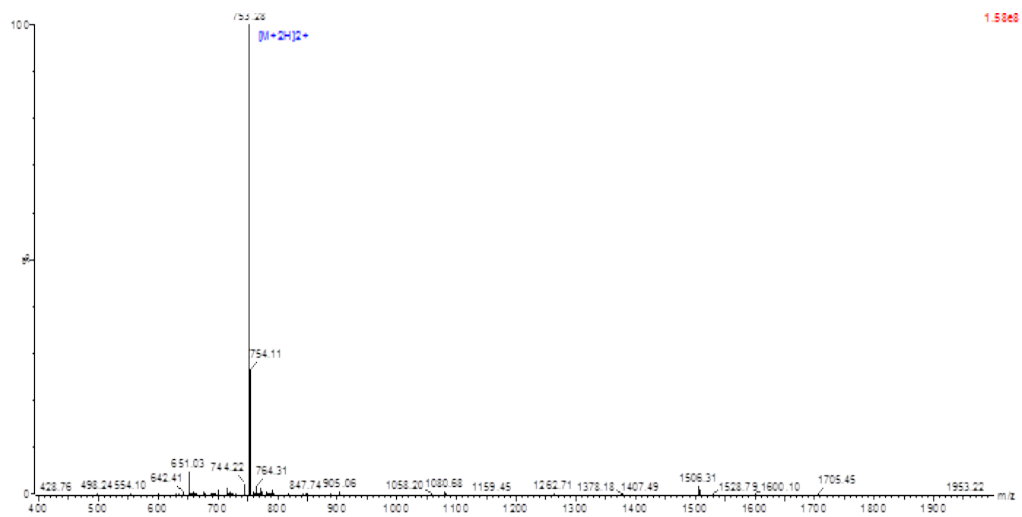

Fig.S6

Figure S1-S6 HPLC-MS analysis of the synthesized peptides P1,P2 and P3.
